# Supplementary material for: Functional VEGFA knockdown with artificial 3′-tailed mirtrons defined by 5′ splice site and branch point
Source: PubMed Central journal article supplement (PMC4513878; doi:10.1093/nar/gkv617), 2015-06-18
Supplement: supp_gkv617_nar-00810-y-2015-File006.pdf [file supp_gkv617_nar-00810-y-2015-File006.pdf]

| Primer                                                 | Sequence                                                                                    |
|--------------------------------------------------------|---------------------------------------------------------------------------------------------|
| <b>pEGFP-Mirt, psiCheck2.2, shRNA and DMPK Cloning</b> |                                                                                             |
| <b>Mirtron cloning</b>                                 | 5'-caag – mirtron sequence forward-3' and<br>5'-cgtc – mirtron sequence reverse-3'          |
| <b>VEGFA T1<br/>for (Mirt 1, 2, 7, 8)</b>              | 5'-tcgatgcagattatgcggatcaaacctgtagacacaccacccaccacaca<br>tacatacatttatgcggatcaaacctcacc-3'  |
|                                                        | 5'-ggcctgggtagggttgatccgcataaatgtatgtatgtgggtgggtggg<br>tgtgtctacaggttgatccgcataaatctgca-3' |
| <b>VEGFA T2<br/>for (Mirt 3, 4, 5, 6)</b>              | 5'-tcgagcctgacctgctgctctacctccacatgatctttttgt<br>cccactaatgtattggtgtcttcac-3'               |
|                                                        | 5'-ggcctggaagacaccaataacattagtgaggacaaaaaaagatcat<br>gtggaggtagagcagcaaggcaaggc-3'          |
| <b>shRNA U6 Reverse</b>                                | 5'-gggtttcgtccttccacaa – <i>mirtron sequence reverse</i> -3'                                |
| <b>U6 Forward</b>                                      | 5'-ggctgcaggtcgacggat-3'                                                                    |
| <b>Quantitative PCR</b>                                |                                                                                             |
| <b>hGAPDH F</b>                                        | 5'-aaggtgaaggtcggagtcaa-3'                                                                  |
| <b>hGAPDH R</b>                                        | 5'-gaagatggtgatggatttc-3'                                                                   |
| <b>VEGFA F</b>                                         | 5'-cggatcaaacctcacc-3'                                                                      |
| <b>VEGFA R</b>                                         | 5'-aggaggctcctcctcct-3'                                                                     |

**Supplementary Table S1.** Oligonucleotides used in this study.

**Natural Mirt877**

```
      ta      at  c c          g caaagac          c
g  gaggag  gg g aggggacacg g          ttggggggtt c
      |||||  || | ||||| ||||| |          ||||| ||||| t
cc  ctctc  cc c tctctgtgt c          gactcccag g
ga  --      --  t t          g -----A          g
```

**Natural Mirt1224**

```
g      cu          -----  u  aucau          c
ugagga  ggggaggugg          aggg agc          uagagc a
|||||  ||||| |||||          |||  |||          |||||
acuccu  cuucuccacc          uccc ucg          gucucg g
g      cu          cccuc  -  acucu          a
```

**TMirt1224 Version 1**

```
g      ct          -----  u  aucau          c
tgagga  ggggaggtgg          aggg agc          uagagc a
|||||  ||||| |||||          |||  |||          |||||
acuccu  cuucuccacc          uccc ucg          gucucg g
t      cu          cccuc  -  acucu          a
t
aattttattatcaccatgacattgactctttcataatctacttag
```

**TMirt1224 Version 2**

```
      t          tc
g  gaggactggggaggtgt a
| o||o||||| ||||| ||||| a
c  tccttgaccctccacca g
Act t          ga
g
atTTTaattttatttagcagcatgagattgactctttcataatctacttaag
```

**Supplementary Figure S1.** Mirt-877 and Mirt-1224 Natural and Tailed Mirtron designs. Cyan nucleotides indicate guide strand. Red nucleotides denotes branch point.



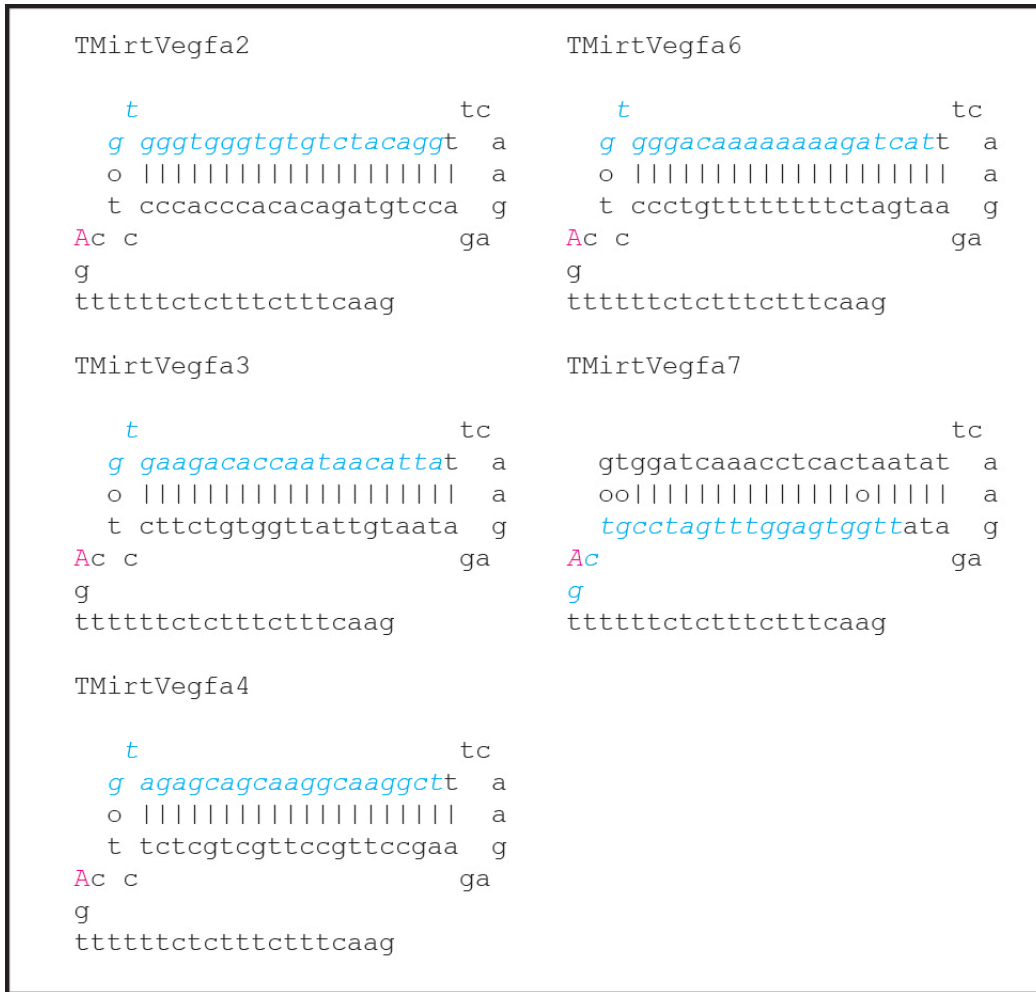

**Supplementary Figure S4.** Human VegfA Tailed Mirtron designs. Cyan nucleotides indicate guide strand. Red nucleotides denotes branch point.

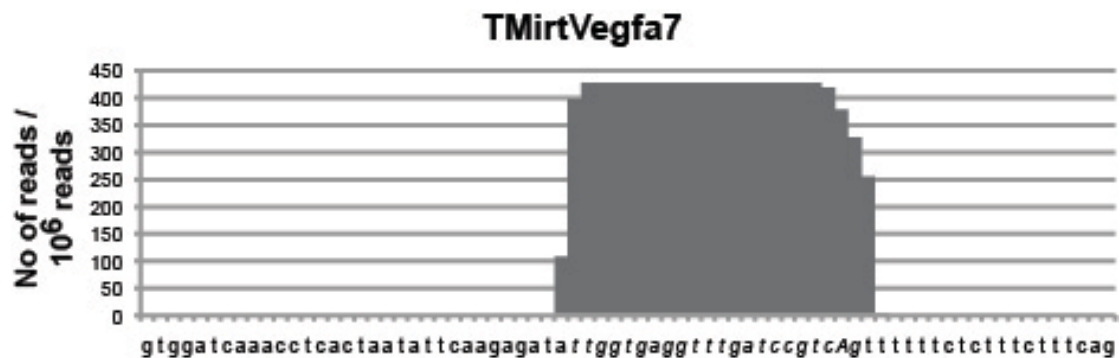

**Supplementary Figure S5.** High throughput sequencing of small RNA from cells transfected with 500ng peGFP-TMirtVegfa7. Nucleotides in italics indicate guide strand; capital letter denotes branch point.
